# Supplementary material for: Seasonal stratospheric ozone trends over 2000–2018 derived from several merged data sets
Source: Copernicus journal article supplement (doi:10.5194/acp-20-7035-2020), 2020-06-15
Supplement: Supplementary file 1 [file acp-20-7035-2020-supplement.pdf]

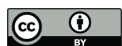

*Supplement of*

## **Seasonal stratospheric ozone trends over 2000–2018 derived from several merged data sets**

**Monika E. Szeląg et al.**

*Correspondence to:* Monika E. Szeląg ([monika.szelag@fmi.fi](mailto:monika.szelag@fmi.fi))

The copyright of individual parts of the supplement might differ from the CC BY 4.0 License.

## Contents

### 1. Figure S1 to S5

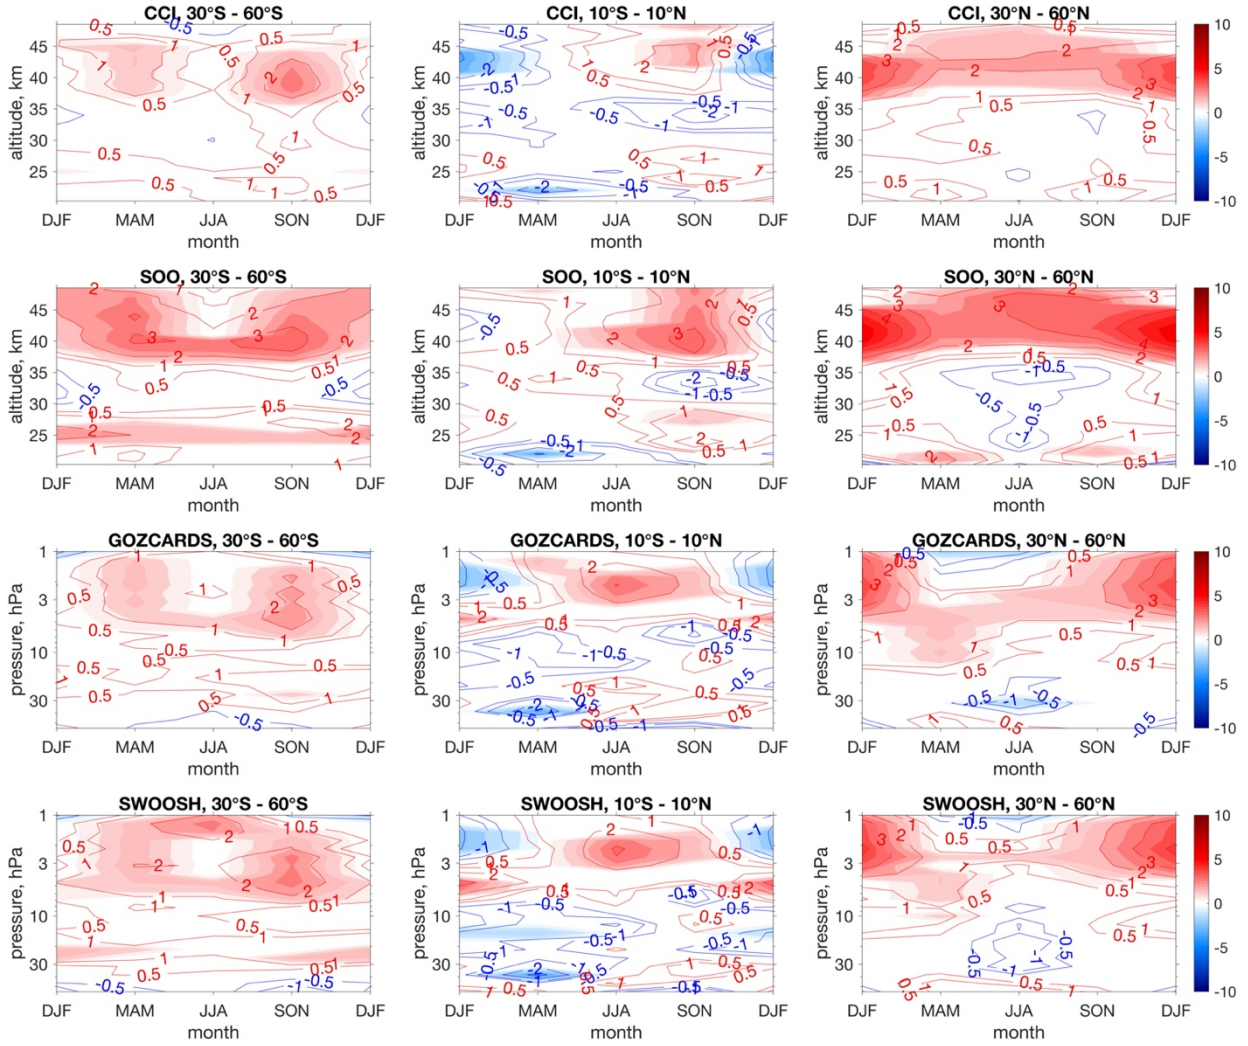

**Figure S1.** Altitude-seasons variation of linear trends in ozone for each of the merged data sets calculated over 2000-2018 for three selected latitudinal bands using method #2 (see description in the Manuscript). Data are presented on their natural vertical coordinate: altitude grid for CCI and SOO and pressure grid for GOZCARDS and SWOOSH. The shading denotes trends that are significant at the 95% level.

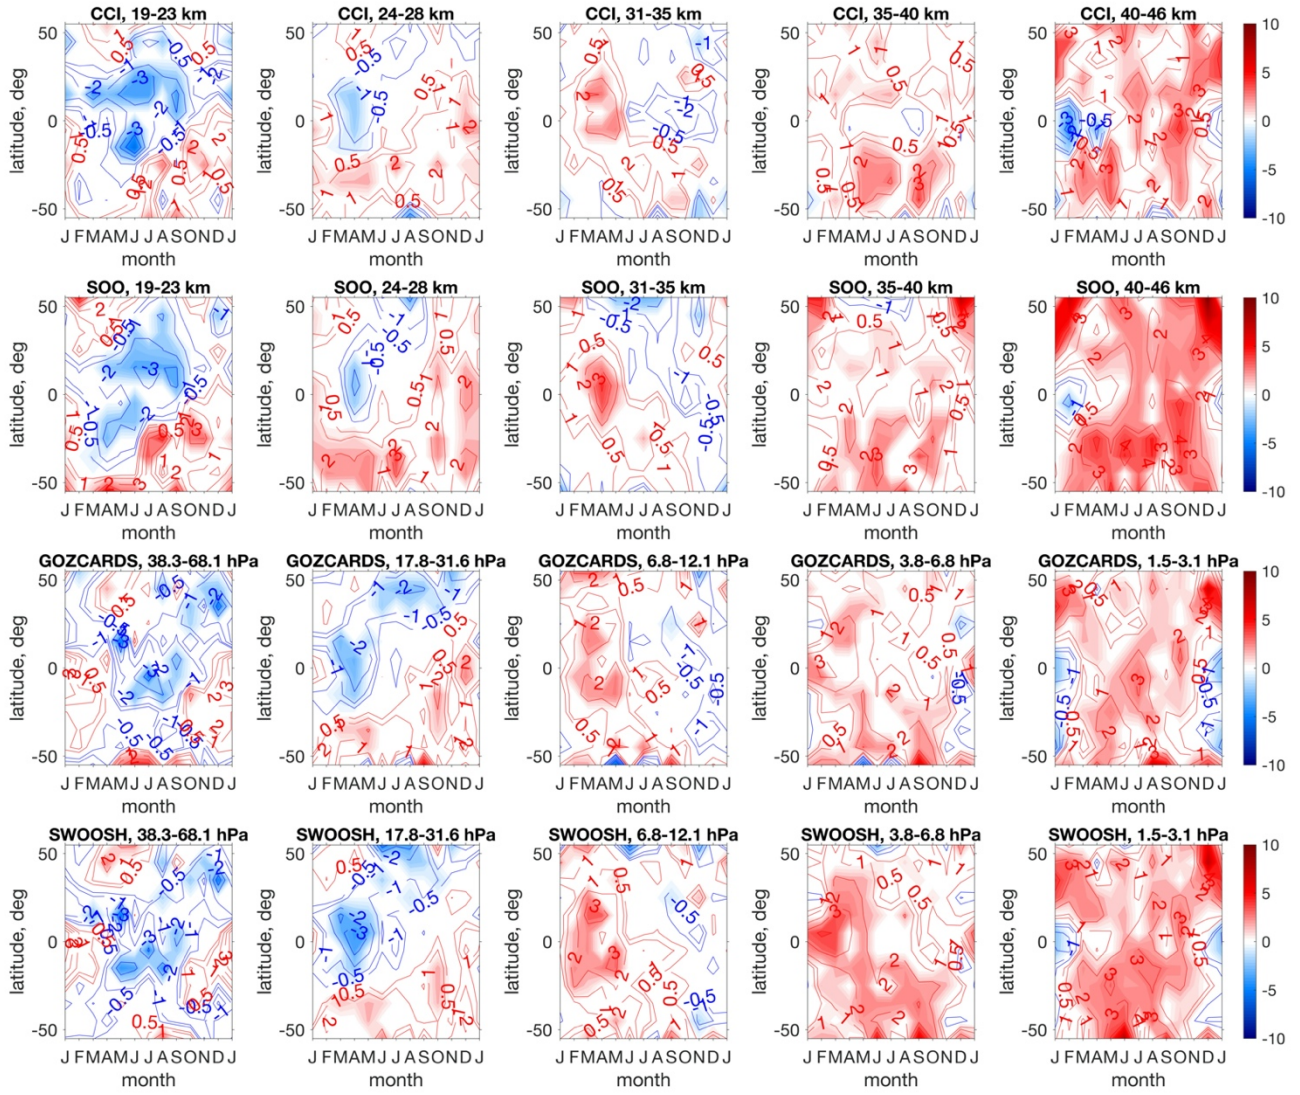

Figure S2. Latitude-months variation of linear trends in ozone for each of the merged data sets calculated over 2000-2018 for five selected altitude/pressure bands. The shading denotes trends that are significant at the 95% level.

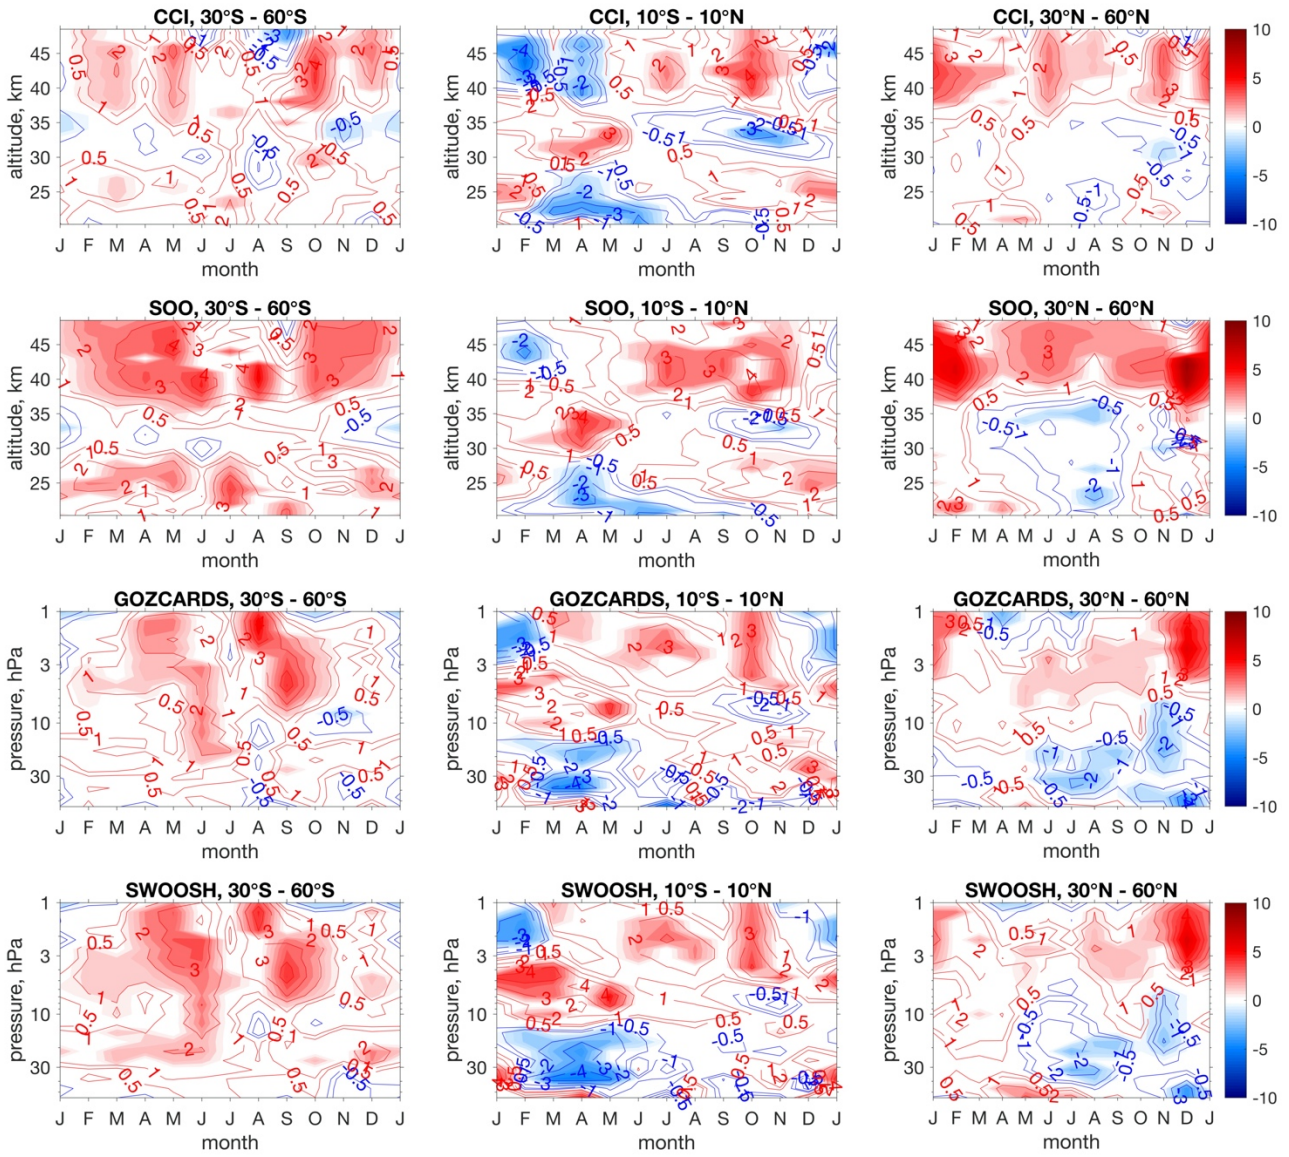

Figure S3. Altitude-months variation of linear trends in ozone for each of the merged data sets calculated over 2000-2016 for three selected latitudinal bands. Data are presented on their natural vertical coordinate: altitude grid for CCI and SOO and pressure grid for GOZCARDS and SWOOSH. The shading denotes trends that are significant at the 95% level.

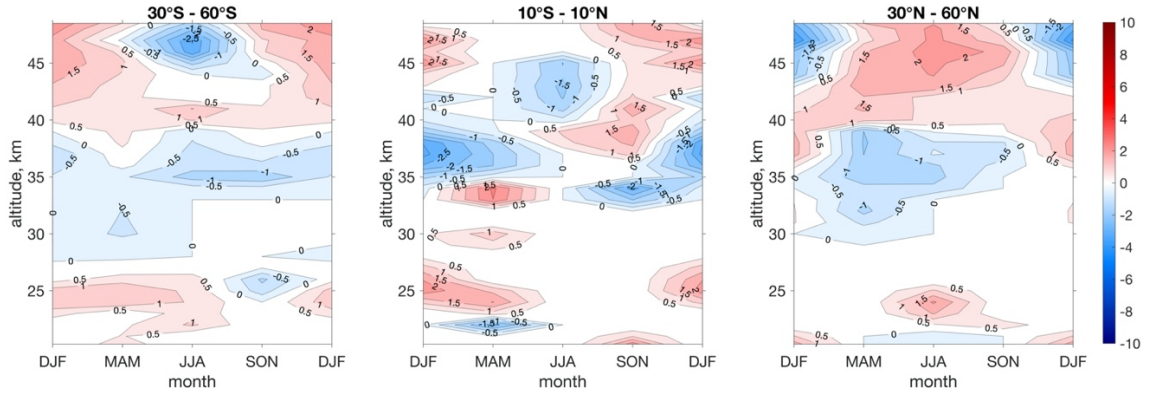

Figure S4. Altitude-seasons variation of the difference of the seasonal trends (mean[CCI, SOO] minus mean[GOZCARDS, SWOOSH]), calculated over 2000-2018 for three selected latitudinal bands.

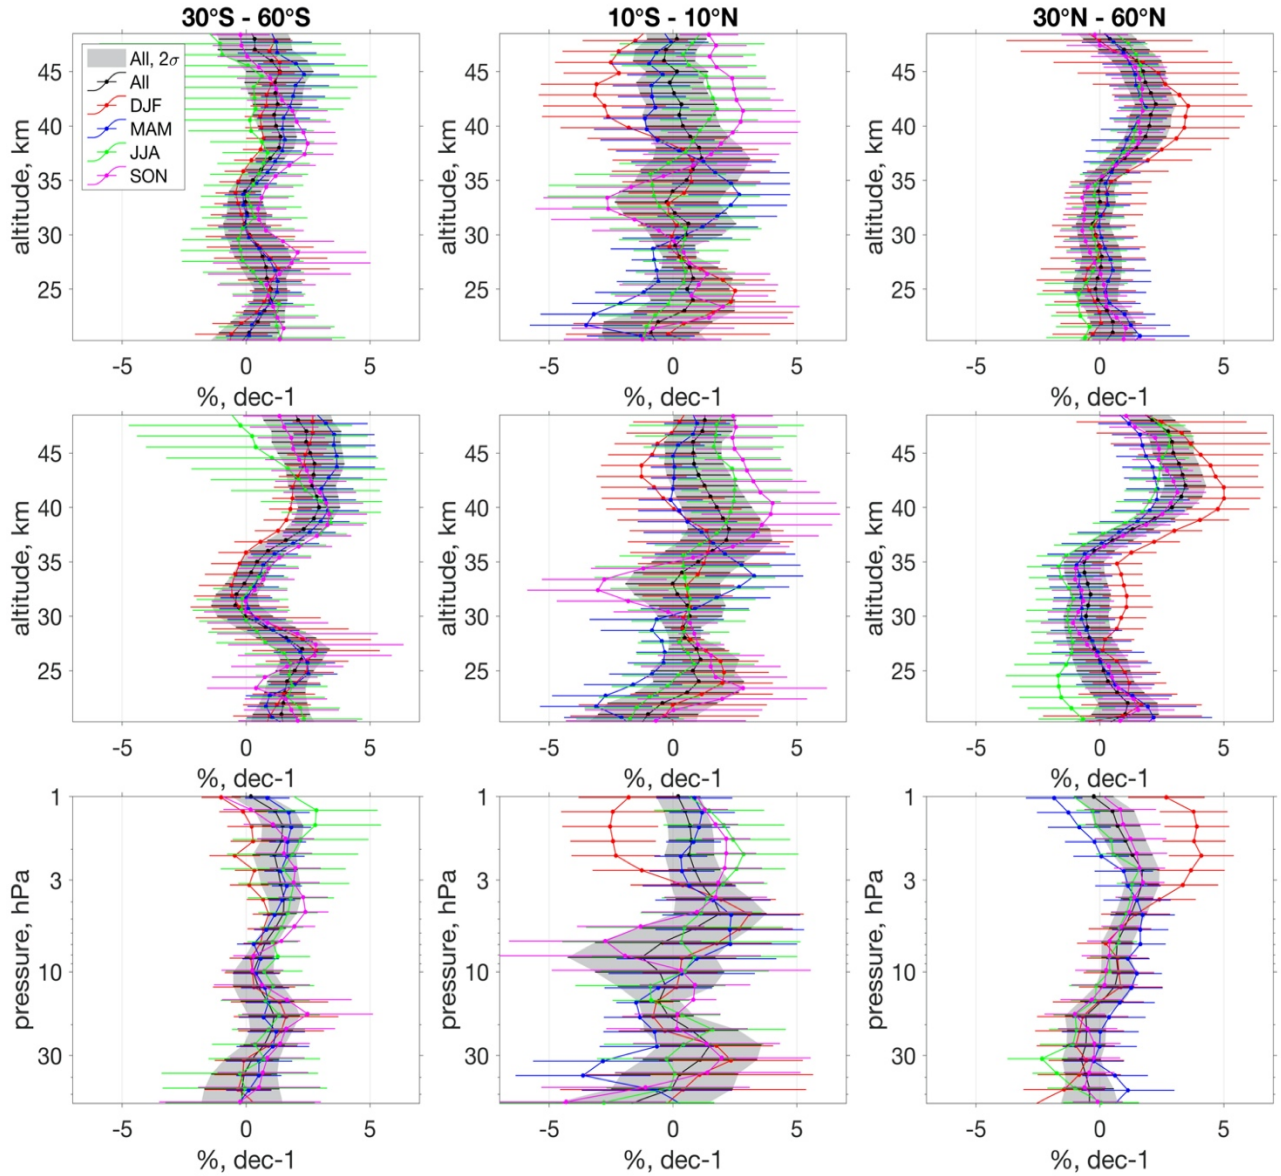

Figure S5. Vertical profiles of seasonal (red, blue, green, magenta) and yearly (black) ozone trends in 2000-2018 from CCI (top panels), SOO (middle panels) and GOZCARDS (bottom panels). The results are shown for three selected latitude bands. Error bars and shaded area (gray) are 2-sigma uncertainties.
